# Supplementary material
Source: ML conference proceedings conference paper supplement (https://aclanthology.org/D17-1260)
Supplement: Attachment [file emnlp2017-app.pdf › emnlp2017-app.pdf]

# Supplementary Materials for Agent-Aware Dropout DQN for Safe and Efficient On-line Dialogue Policy Learning

Lu Chen and Xiang Zhou and Cheng Chang and Runzhe Yang and Kai Yu  
Key Lab. of Shanghai Education Commission for Intelligent Interaction and Cognitive Eng.  
SpeechLab, Department of Computer Science and Engineering  
Brain Science and Technology Research Center  
Shanghai Jiao Tong University, Shanghai, China  
{chenlusz, owenzx, cheng.chang, yang\_runzhe, kai.yu}@sjtu.edu.cn

## A Details of Restaurant Information Domain

There are 7 slots in restaurant information domain, among which 4 slots are “informable”. An informable slot is one which the user can provide a value for, to use as a constraint on their search. All 7 slots are “requestable”, i.e. the user can request the value of any slot. The details are described in Table 1.

| slots      | informable | requestable |
|------------|------------|-------------|
| area       | Yes        | Yes         |
| food       | Yes        | Yes         |
| pricerange | Yes        | Yes         |
| name       | Yes        | Yes         |
| addr       | No         | Yes         |
| phone      | No         | Yes         |
| postcode   | No         | Yes         |

Table 1: Slots in restaurant information domain

There are 16 summary actions for system: *repeat*, *request\_area*, *request\_food*, *request\_pricerange*, *confirm\_area*, *confirm\_food*, *confirm\_pricerange*, *confirm\_name*, *select\_area*, *select\_food*, *select\_pricerange*, *select\_name*, *offer\_1*, *offer\_2*, *offer\_3*, *offer\_4*. More details are described in Table 2.

| Action Type      | Description                                                                         |
|------------------|-------------------------------------------------------------------------------------|
| <i>repeat</i>    | Ask the user to repeat.                                                             |
| <i>request_x</i> | Ask the user what their goal for slot $x$ is.                                       |
| <i>confirm_x</i> | Ask the user to confirm whether the most likely value for slot $x$ is right or not. |
| <i>select_x</i>  | Ask the user to pick from the suggested two values for slot $x$ .                   |
| <i>offer_n</i>   | Suggest a venue which matches $n$ informable slot constraints.                      |

Table 2: Description of different summary action types.

## B Dialogue Belief State and Rule-based Policy

### B.1 Dialogue Belief State

At  $t$ -th turn, for each informable slot  $s$ , a belief state  $\mathbf{b}_s = \{b_s^1, \dots, b_s^{n_s}, b_s^r\}^1$  is maintained, where  $b_s^1 > b_s^2 > \dots > b_s^{n_s}$ ,  $n_s$  is the number of candidate values for  $s$ , and  $b_s^r$  denotes the belief that  $s$  has not been mentioned by the user up to  $t$ -th turn, i.e. the belief for the special value “none”. Mathematically,  $b_s^r = 1 - \sum_{i=1}^{n_s} b_s^i$ .

For each slot, if  $b_s^1$  is more than  $b_s^r$ , the slot-value pair  $(s, v_s^1)$  with corresponding belief  $b_s^1$  will be added into the database query constraints  $\mathcal{DC}$ .

### B.2 Rule-based Policy

The rules R1, R2, R3, R1\* and R4 are described in Algorithm 1~5. Figure 1 gives an example to show the difference of decisions made by different ordered rules.

---

#### Algorithm 1 Rule R1

---

**Require:**

The belief state  $\mathbf{b}_s = \{b_s^1, \dots, b_s^{n_s}, b_s^r\}$  for each slot.

- 1: Initialize the summary action  $a$  with *null*.
  - 2: **for**  $s = \text{area, food, pricerange, name}$  **do**
  - 3:   **if**  $b_s^1 \geq 0.1$  and  $b_s^1 < 0.6$  **then**
  - 4:      $a \leftarrow \text{confirm}_s$
  - 5:   **break**
  - 6: **end if**
  - 7: **end for**
  - 8: **return**  $a$
- 

<sup>1</sup>For the sake of brevity, the subscript  $t$  is omitted.

---

**Algorithm 2 Rule R2**

---

**Require:**

The belief state  $\mathbf{b}_s = \{b_s^1, \dots, b_s^{n_s}, b_s^r\}$  for each slot.

- 1: Initialize the summary action  $a$  with *null*.
- 2: Initialize the database query constraints  $\mathcal{DC}$  with  $\{\}$ .
- 3: **for**  $s = \text{area, food, pricerange, name}$  **do**
- 4:   **if**  $b_s^1 > b_s^r$  **then**
- 5:     Add  $(s, v_s^1, b_s^1)$  into  $\mathcal{DC}$ .
- 6:     **break**
- 7:   **end if**
- 8: **end for**
- 9:  $n \leftarrow \#\mathcal{DC}$
- 10: **if**  $n > 0$  **then**
- 11:    $a \leftarrow \text{offer}_n$
- 12: **end if**
- 13: **return**  $a$

---

---

**Algorithm 3 Rule R3**

---

- 1: Equally sample a slot  $s$  from  $\{\text{area, food, pricerange}\}$ .
- 2:  $a \leftarrow \text{request}_s$
- 3: **return**  $a$

---

---

**Algorithm 4 Rule R1\***

---

**Require:**

The belief state  $\mathbf{b}_s = \{b_s^1, \dots, b_s^{n_s}, b_s^r\}$  for each slot.

- 1: Initialize the summary action  $a$  with *null*.
- 2: **for**  $s = \text{area, food, pricerange, name}$  **do**
- 3:   **if**  $s = \text{food}$  **then**
- 4:     **if**  $b_s^1 \geq 0.1$  and  $b_s^1 < 0.6$  **then**
- 5:        $a \leftarrow \text{confirm}_s$
- 6:       **break**
- 7:     **end if**
- 8:   **else**
- 9:     **if**  $b_s^1 \geq 0.1$  and  $b_s^1 < b_s^r$  **then**
- 10:        $a \leftarrow \text{confirm}_s$ .
- 11:       **break**
- 12:     **end if**
- 13:   **end if**
- 14: **end for**
- 15: **return**  $a$

---

---

**Algorithm 5 Rule R4**

---

**Require:**

The belief state  $\mathbf{b}_s = \{b_s^1, \dots, b_s^{n_s}, b_s^r\}$  for each slot.

- 1: Initialize the summary action  $a$  with *null*.
- 2: Initialize the database query constraints  $\mathcal{DC}$  with  $\{\}$ .
- 3: **for**  $s = \text{area, food, pricerange, name}$  **do**
- 4:   **if**  $b_s^1 > b_s^r$  **then**
- 5:     Add  $(s, v_s^1, b_s^1)$  into  $\mathcal{DC}$ .
- 6:     **break**
- 7:   **end if**
- 8: **end for**
- 9:  $n \leftarrow \#\mathcal{DC}$
- 10: **if**  $n = 1$  and *area* is not in  $\mathcal{DC}$  **then**
- 11:    $a \leftarrow \text{request\_area}$
- 12: **end if**
- 13: **return**  $a$

---

## C Details of Companion Function

In our experiments, the probability of guidance from the teacher  $p_{tea}$  is determined by the value of  $\Delta C_e$ . The chosen function should meet the following requirements: monotonously increasing and the value has domain  $[0, 1]$ . According to the results of our early experiments, the use of simple linear function does not provide good result, the system suffers from great performance loss in the early stage so the safety of the system is not guaranteed. Therefore, we choose to use a concave function. In detail, the function used in our experiment is a hyperbola:

$$P_{tea}(\Delta C_e) = \phi(\lambda) = -\frac{1}{\lambda + \frac{\sqrt{5}-1}{2}} + \frac{\sqrt{5}+1}{2},$$

where  $\lambda = \frac{\Delta C_e}{C_{th} - \bar{C}_{min}}$ , and  $\bar{C}_{min}$  is the minimum value of  $\bar{C}_e$  reached by the system in the experiments. This function meets all the requirements above while maintaining its simplicity. It performs well in the experiments.

## D Illustrations of Safety Loss and Efficiency Loss

### D.1 Safety Loss

As mentioned in section 4, the value of safety loss is equivalent to the area of the region between the acceptable performance line and the system performance curve. An illustration is shown in Figure 3, the safety loss is equal to the area of the blue region.

|                                   | area                                                       | food                                          | pricerange                                   | name            |
|-----------------------------------|------------------------------------------------------------|-----------------------------------------------|----------------------------------------------|-----------------|
| <b>dialogue belief state</b>      | east = 0.09<br>West = 0.04<br>center = 0.01<br>none = 0.86 | Chinese = 0.08<br>French = 0.02<br>none = 0.9 | cheap = 0.5<br>expensive = 0.2<br>none = 0.3 | none = 1.0      |
| <b>database query constraints</b> | (pricerange, cheap) 0.5                                    |                                               |                                              |                 |
| <b>ordered rules</b>              | R1, R2, R3                                                 | R1, R4, R2, R3                                | R1*, R2, R3                                  | R1*, R4, R2, R3 |
| <b>summary action</b>             | confirm_pricerange                                         | confirm_pricerange                            | offer_1                                      | request_area    |

Figure 1: An example to show the difference of decisions made by different ordered rules.

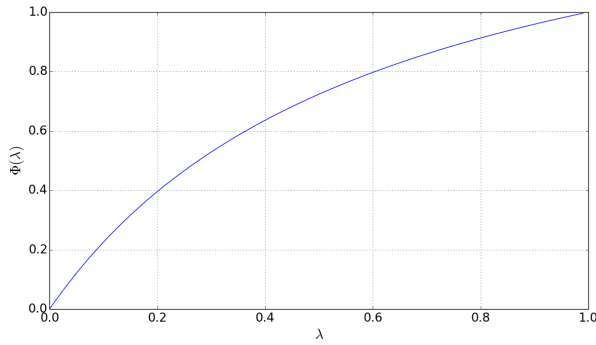

Figure 2: Graph of function  $\phi(\lambda)$

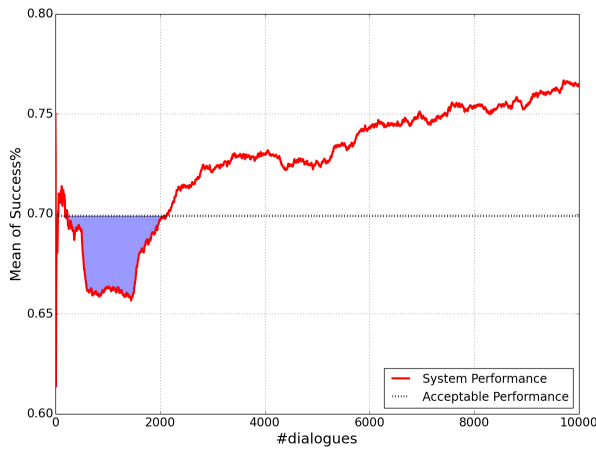

Figure 3: Illustration of Safety Loss

## D.2 Efficiency Loss

In comparison to the safety loss, the efficiency loss gives a greater penalty on the time. The intuition behind the mathematical equation is that we want to penalize the performance loss after a longer time period more than the performance loss at the very beginning. This is achieved by multiplying  $e$  to each loss  $\max(0, S_i - S_e)$  in the summation.

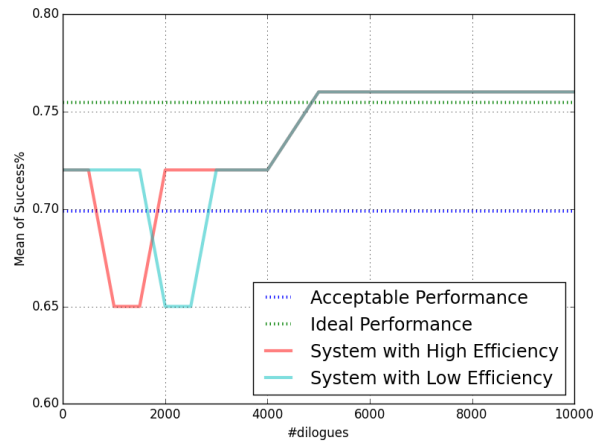

Figure 4: Comparison of Efficiency Loss between two Systems

For instance, shown in Figure 4, the area between the ideal performance line and the blue/red line are exactly the same. However, the blue line presents a large performance drop in later dialogues, which has a greater time penalty leading to a greater efficiency loss value. Therefore, the efficiency loss will prefer the red line, which is consistent with the normal intuition.
